# Supplementary material for: VSV-ΔG-Spike Candidate Vaccine Induces Protective Immunity and Protects K18-hACE2 Mice against SARS-CoV-2 Variants
Source: MDPI journal article supplement (doi:10.3390/v15061364), 2023-06-13
Supplement: s1 [file s1]

**Supplementary data:**

|        | Original virus |      | Alpha    |      | Beta      |      | Gamma   |         | delta  |      |
|--------|----------------|------|----------|------|-----------|------|---------|---------|--------|------|
|        |                | FC   |          | FC   |           | FC   |         | FC      |        | FC   |
| Top 10 | Ifi205         | 2245 | Ifi205   | 1197 | Gm10925   | 1994 | Gm14648 | 1618316 | Ifi205 | 5726 |
|        | Cxcl9          | 1320 | Il12b    | 594  | Ifi205    | 1024 | Ifi205  | 2166    | Slfn4  | 3221 |
|        | Il12b          | 1173 | Cxcl9    | 559  | RSP13-Ps2 | 651  | Il12b   | 1761    | Gzmb   | 1718 |
|        | Tgm1           | 1120 | Slfn4    | 503  | Cxcl9     | 471  | Cxcl9   | 1290    | Phf11a | 1683 |
|        | Il1rn          | 874  | Gzmb     | 234  | Il12b     | 354  | Slfn4   | 953     | Cxcl9  | 1650 |
|        | Phf11a         | 860  | Phf11a   | 233  | Slfn4     | 306  | Tgm1    | 902     | Acod1  | 1555 |
|        | Slfn4          | 817  | BC023105 | 232  | Phf11a    | 280  | Mmp3    | 878     | Il12b  | 1554 |
|        | Gzmb           | 591  | Cd69     | 230  | Gm112918  | 274  | Phf11a  | 829     | Tgm1   | 1537 |
|        | Ccl4           | 571  | Mmp3     | 228  | Gzmb      | 248  | Il1rn   | 751     | Il1rn  | 1451 |
|        | Mmp3           | 496  | Cxcl10   | 216  | Cd69      | 248  | Ccl4    | 640     | Clec4e | 1402 |

|           |            |     |        |     |         |      |          |     |        |      |
|-----------|------------|-----|--------|-----|---------|------|----------|-----|--------|------|
| Top 11-20 | LT629149.4 | 471 | Ccl4   | 214 | Clec4e  | 183  | Cxcl10   | 614 | Cd69   | 1101 |
|           | Cxcl10     | 464 | Tnf    | 208 | Plac8   | 167  | Gzmb     | 508 | Mmp3   | 1032 |
|           | Ifi206     | 460 | Ifi206 | 201 | Tnf     | 167  | Acod1    | 496 | Plac8  | 995  |
|           | Cd69       | 456 | Ccl12  | 197 | Ifi206  | 141  | Tnf      | 471 | Cfb    | 899  |
|           | Bcl2a1d    | 391 | Ccl2   | 190 | Cxcl10  | 1341 | Ifi206   | 462 | Tnf    | 890  |
|           | BC23105    | 381 | Il1rn  | 185 | Ccl4    | 126  | Cd69     | 455 | Ifi206 | 880  |
|           | Ccl12      | 378 | Acod1  | 172 | Ccl12   | 124  | Ccl2     | 437 | Ccl4   | 802  |
|           | Slc10a6    | 373 | Tgm1   | 144 | Tgm1    | 120  | Ccl12    | 400 | Ly6i   | 668  |
|           | Gm49339    | 347 | Plac8  | 134 | BC23105 | 120  | Lcn2     | 388 | Cxcl10 | 632  |
|           | Lcn2       | 337 | Ccl3   | 131 | GM9797  | 112  | BC023105 | 380 | Prl1   | 581  |

**Supplementary Table S1:** Top 20 DEGs in unvaccinated and infected mice brains (“set 1”): (a) Top 10 DEGs, and (b) 11-20 top DEGs ranked according to fold change (FC) effected by infection with each of the tested variants. Top 10 genes of the original virus are colored to highlight their position in the top 20 genes upregulated by the other variants as well. Genes is black are shared by more than one variant. Gray genes are only in the top 20 of one of the variants.

a

| unvaccinated and infected ("set 1")                                              |          |                  |                                                                                  |         |                  |                                                                                  |         |                  |                                                                                  |         |                  |                                                                                  |          |                  |
|----------------------------------------------------------------------------------|----------|------------------|----------------------------------------------------------------------------------|---------|------------------|----------------------------------------------------------------------------------|---------|------------------|----------------------------------------------------------------------------------|---------|------------------|----------------------------------------------------------------------------------|----------|------------------|
| Original virus                                                                   |          |                  | Alpha                                                                            |         |                  | Beta                                                                             |         |                  | Gamma                                                                            |         |                  | delta                                                                            |          |                  |
|                                                                                  | p-value  | overlap          |                                                                                  | p-value | overlap          |                                                                                  | p-value | overlap          |                                                                                  | p-value | overlap          |                                                                                  | p-value  | overlap          |
| Role of Hypercytokinemia/hyperchemokine-<br>mia in the Pathogenesis of Influenza | 2.30E-36 | 40.7 %<br>35/86  | Role of Hypercytokinemia/hyperchemokine-<br>mia in the Pathogenesis of Influenza | 1.5E-34 | 31.4 %<br>27/86  | Role of Hypercytokinemia/hyperchemokine-<br>mia in the Pathogenesis of Influenza | 2.4E-38 | 36.0 %<br>31/86  | Role of Hypercytokinemia/hyperchemokine-<br>mia in the Pathogenesis of Influenza | 6.6E-37 | 41.9 %<br>36/86  | Role of Hypercytokinemia/hyperchemokine-<br>mia in the Pathogenesis of Influenza | 3.08E-36 | 41.9 %<br>36/86  |
| Role of Pattern Recognition Receptors in Recognition of Bacteria and Viruses     | 1.52E-28 | 23.7 %<br>37/156 | Role of Pattern Recognition Receptors in Recognition of Bacteria and Viruses     | 9.5E-19 | 13.5 %<br>21/156 | Role of Pattern Recognition Receptors in Recognition of Bacteria and Viruses     | 5.7E-24 | 17.3 %<br>27/156 | Role of Pattern Recognition Receptors in Recognition of Bacteria and Viruses     | 6.5E-30 | 25.0 %<br>39/156 | Role of Pattern Recognition Receptors in Recognition of Bacteria and Viruses     | 4.84E-28 | 24.4 %<br>38/156 |
| Granulocyte Adhesion and Diapedesis                                              | 2.89E-24 | 19.0 %<br>36/189 | Granulocyte Adhesion and Diapedesis                                              | 5.3E-17 | 11.1 %<br>21/189 | Agranulocyte Adhesion and Diapedesis                                             | 2.3E-21 | 13.1 %<br>28/214 | Granulocyte Adhesion and Diapedesis                                              | 2.6E-23 | 19.0 %<br>36/189 | TREM1 Signaling                                                                  | 2.20E-26 | 36.4 %<br>28/77  |
| TREM1 Signaling                                                                  | 1.06E-20 | 29.9 %<br>23/77  | Agranulocyte Adhesion and Diapedesis                                             | 6.8E-16 | 9.8 %<br>21/214  | Granulocyte Adhesion and Diapedesis                                              | 2.6E-19 | 13.2 %<br>25/189 | TREM1 Signaling                                                                  | 2.2E-21 | 31.2 %<br>24/77  | Crosstalk between Dendritic Cells and Natural Killer Cells                       | 4.65E-24 | 30.8 %<br>28/91  |
| Agranulocyte Adhesion and Diapedesis                                             | 2.30E-19 | 15.4 %<br>33/214 | Interferon Signaling                                                             | 1.4E-14 | 30.6 %<br>11/36  | Pyroptosis Signaling Pathway                                                     | 2.8E-17 | 19.4 %<br>18/93  | Crosstalk between Dendritic Cells and Natural Killer Cells                       | 1.8E-19 | 26.4 %<br>24/91  | Granulocyte Adhesion and Diapedesis                                              | 9.99E-24 | 19.6 %<br>37/189 |

b

| vaccinated and infected ("set 2")     |          |                 |                                                |         |                |                                           |         |                |                                          |         |                |                                          |          |                |
|---------------------------------------|----------|-----------------|------------------------------------------------|---------|----------------|-------------------------------------------|---------|----------------|------------------------------------------|---------|----------------|------------------------------------------|----------|----------------|
| Original virus                        |          |                 | Alpha                                          |         |                | Beta                                      |         |                | Gamma                                    |         |                | delta                                    |          |                |
|                                       | p-value  | overlap         |                                                | p-value | overlap        |                                           | p-value | overlap        |                                          | p-value | overlap        |                                          | p-value  | overlap        |
| Protein Kinase A Signaling            | 6.70E-07 | 3.4 %<br>14/409 | Iron Homeostasis Signaling Pathway             | 2.6E-04 | 3.6 %<br>5/139 | G-Protein Coupled Receptor Signaling      | 1.8E-03 | 1.3 %<br>9/703 | Agranulocyte Adhesion and Diapedesis     | 2.3E-03 | 1.9 %<br>4/214 | Dilated Cardiomyopathy Signaling Pathway | 1.56E-06 | 5.4 %<br>8/148 |
| Circadian Rhythm Signaling            | 2.02E-06 | 4.1 %<br>11/269 | Pyridoxal 5'-phosphate Salvage Pathway         | 2.5E-03 | 4.5 %<br>3/66  | Inflammasome pathway                      | 2.8E-03 | 10 %<br>2/20   | Wound Healing Signaling Pathway          | 4.2E-03 | 1.6 %<br>4/252 | Cellular Effects of Sildenafil (Viagra)  | 1.72E-06 | 5.3 %<br>8/150 |
| SNARE Signaling Pathway               | 3.64E-05 | 5.1 %<br>7/136  | Circadian Rhythm Signaling                     | 4.9E-03 | 1.9 %<br>5/269 | Wound Healing Signaling Pathway           | 3.2E-03 | 2.0 %<br>5/252 | Spermine Biosynthesis                    | 5.2E-03 | 50.0 %<br>1/2  | Oxytocin Signaling Pathway               | 2.51E-05 | 3.2 %<br>9/282 |
| Calcium Signaling                     | 1.11E-04 | 3.7 %<br>8/218  | Salvage Pathways of Pyrimidine Ribonucleotides | 7.5E-03 | 3.1 %<br>3/98  | HOTAIR Regulatory Pathway                 | 4.0E-03 | 2.5 %<br>4/163 | Th2 Pathway                              | 5.5E-03 | 2.2 %<br>3/137 | eNOS Signaling                           | 2.72E-05 | 4.4 %<br>7/159 |
| White Adipose Tissue Browning Pathway | 3.32E-04 | 4.3 %<br>6/138  | Sumoylation Pathway                            | 8.6E-03 | 2.9 %<br>3/103 | Germ Cell-Sertoli Cell Junction Signaling | 4.7E-03 | 2.3 %<br>4/171 | Dilated Cardiomyopathy Signaling Pathway | 6.8E-03 | 2.0 %<br>3/148 | Renin-Angiotensin Signaling              | 5.62E-05 | 4.9 %<br>6/122 |

**Supplementary Table S2:** Top 5 canonical pathways in brains of unvaccinated and infected mice ("set 1"), and vaccinated and infected mice ("set 2"): Top 5 canonical pathways in (a) brains of unvaccinated and infected mice ("set 1"), and (b) brains of vaccinated and infected mice ("set 2"). For each pathway, p-value is indicated, as well as overlap in percentage, and number of genes that participate in the pathway. The top 5 canonical pathways of the original virus are colored, to highlight their position among the Top 5 pathways of the other tested variants.

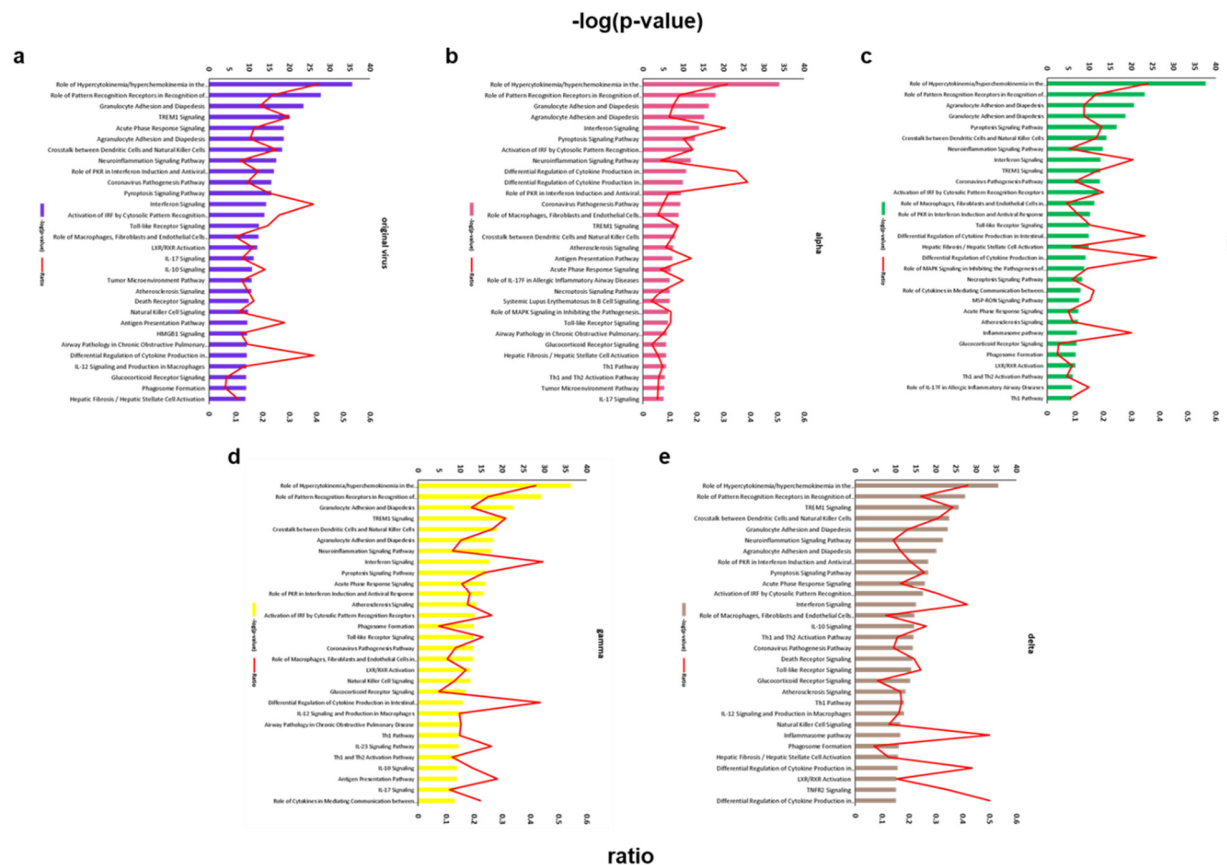

**Supplementary Figure S1:** Enrichment of canonical pathways in brains of mice infected with SARS-CoV-2 variants: Ingenuity pathway Analysis (IPA) of canonical pathways showing both upregulated and downregulated pathways ranked according to their  $-\log(p\text{-value})$  for each variant in “set 1” – unvaccinated mice infected with (a) the original virus (purple bars), (b) alpha (red bars), (c) beta (green bars), (d) gamma (yellow bars) or delta (brown bars). Analysis threshold is  $-\log(p\text{-value}) > 2$ . “Ratio” (red curve) indicates the number of molecules from the data set that map to the pathway listed divided by the total number of molecules that map to the canonical pathway from within the IPA database. X axis: pathways, left Y axis:  $-\log(p\text{-value})$ , right Y axis: ratio.

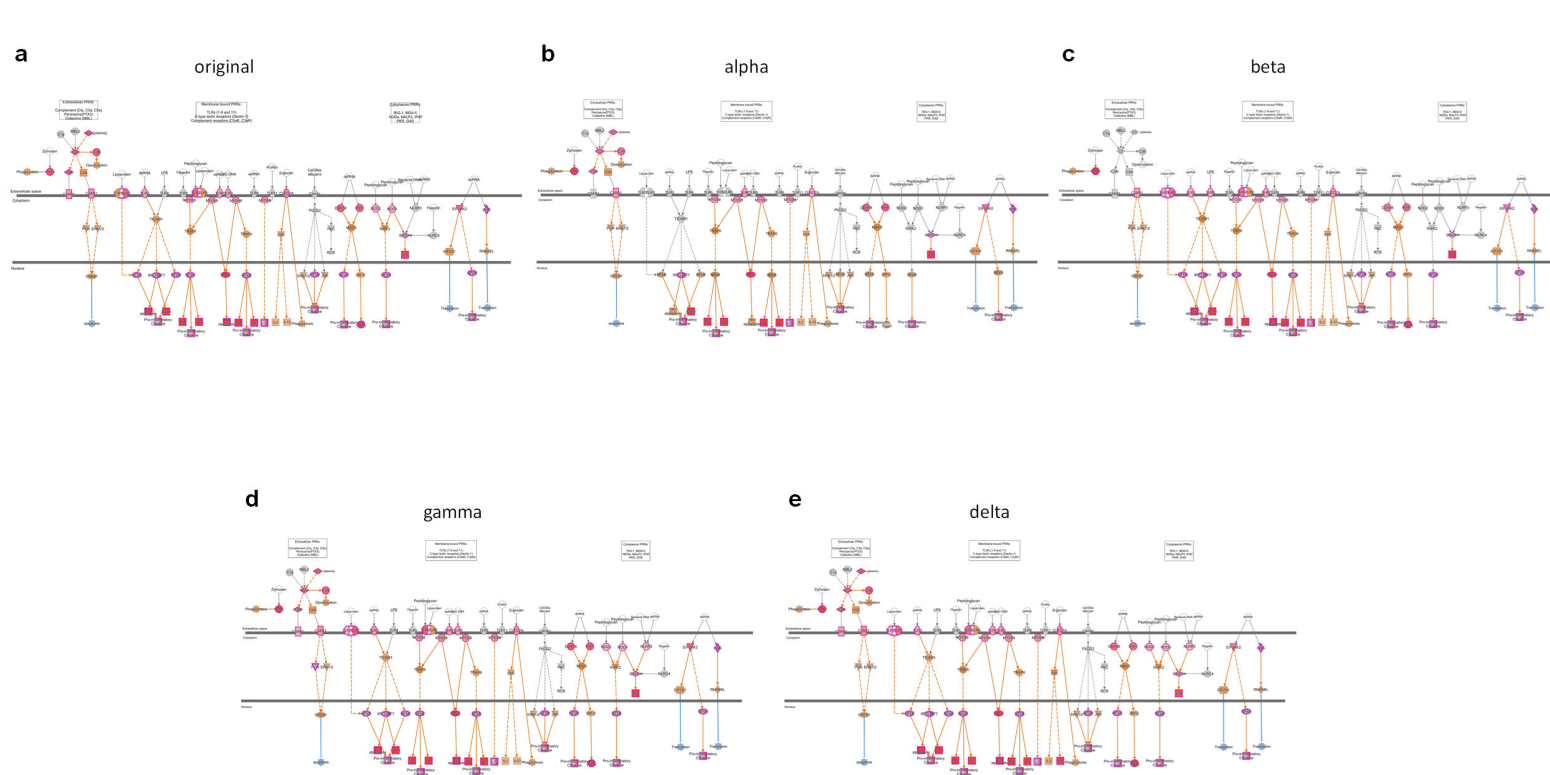

**Supplementary Figure S2:** “Role of Pattern Recognition Receptors in Recognition of Bacteria and Viruses” (PRR): Upregulated expression is indicated by red nodes. Predicted activation is indicated by orange nodes. Lines indicate relations between molecules with direct (solid) or indirect (dashed). Schemes are presented for unvaccinated mice brains at 5 dpi with (a) the original virus, (b) alpha, (c) beta, (d) gamma or (e) delta SARS-CoV-2 variant, showing a very similar and activation patterns upon infection regardless of SARS-CoV-2 variant identity.

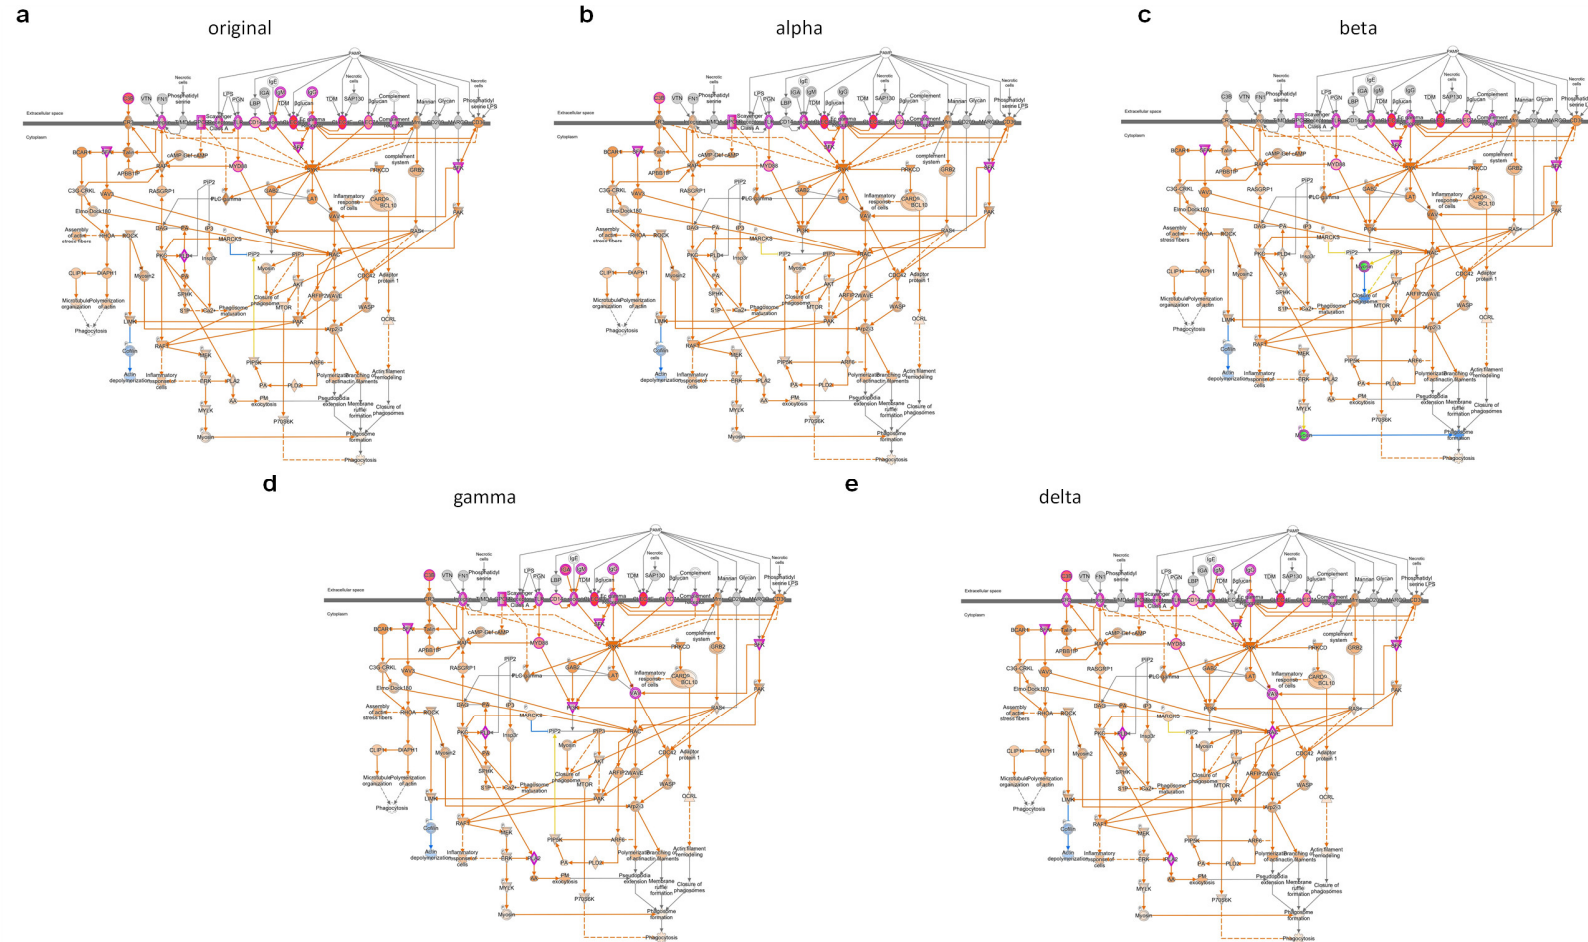

**Supplementary Figure S3:** “Phagosome formation”: Upregulated expression is indicated by red nodes. Predicted activation is indicated by orange nodes. Lines indicate relations between molecules with direct (solid) or indirect (dashed). Schemes are presented for unvaccinated mice brains at 5 dpi with (a) the original virus, (b) alpha, (c) beta, (d) gamma or (e) delta SARS-CoV-2 variant, showing a very similar and activation patterns upon infection regardless of SARS-CoV-2 variant identity.

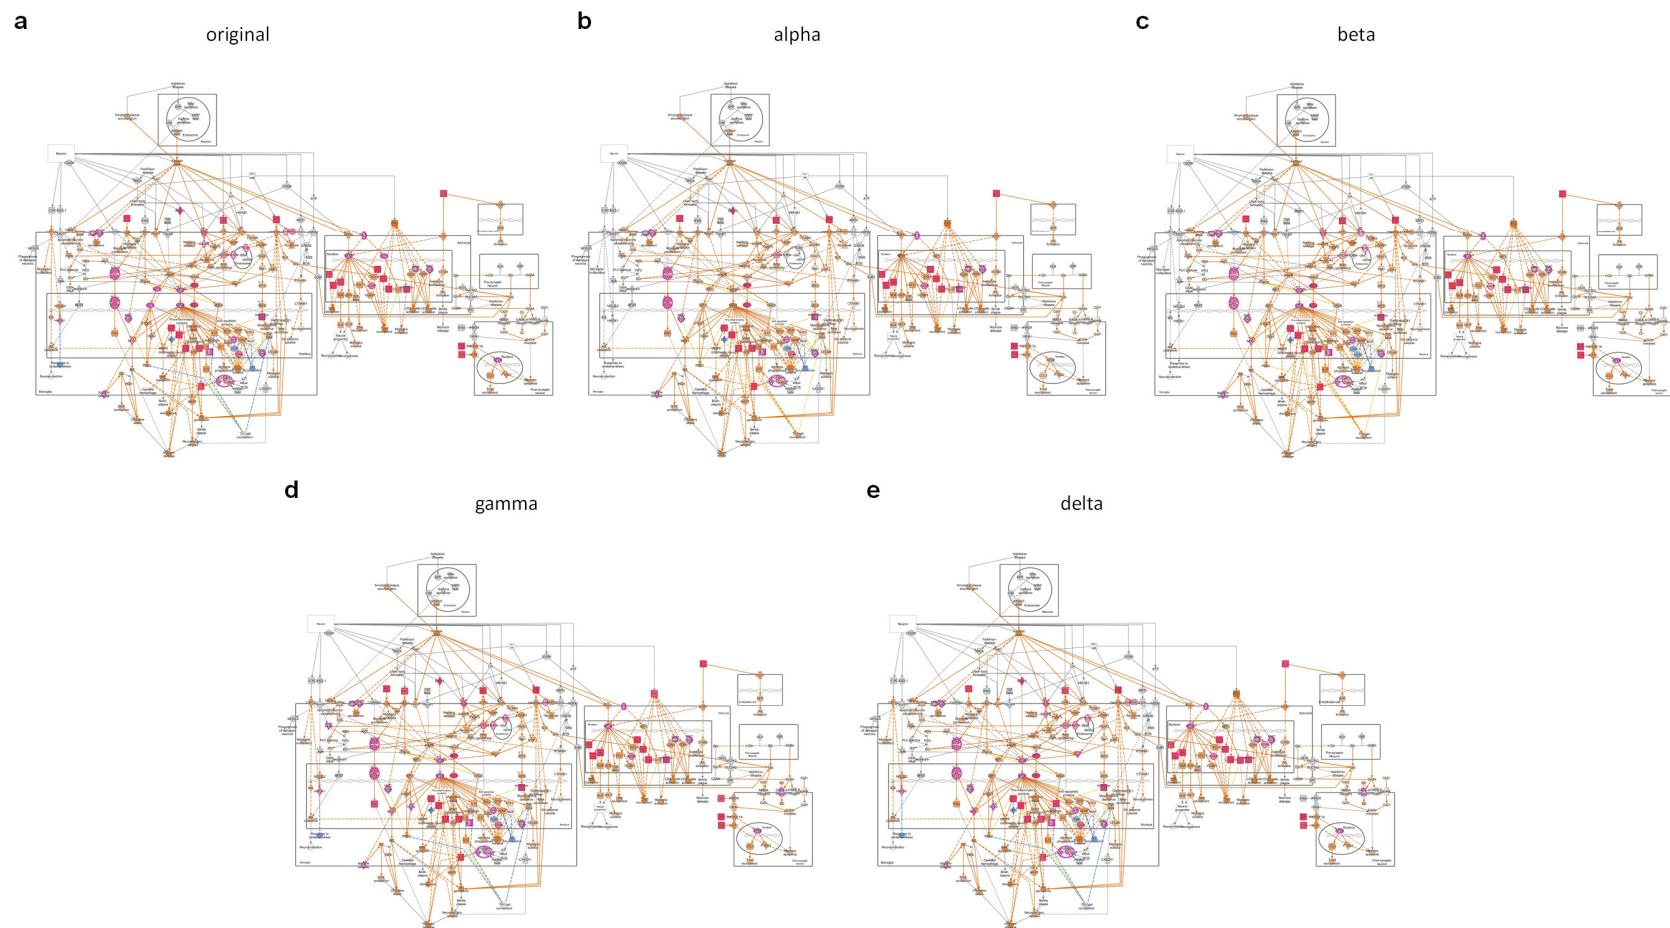

**Supplementary Figure S4:** “Neuroinflammation Signaling Pathway”: Upregulated expression is indicated by red nodes. Predicted activation is indicated by orange nodes. Lines indicate relations between molecules whether direct (solid) or indirect (dashed). Schemes are presented for unvaccinated mice brains at 5 dpi with (a) the original virus, (b) alpha, (c) beta, (d) gamma or (e) delta SARS-CoV-2 variant, showing a very similar and activation patterns upon infection regardless of SARS-CoV-2 variant identity.
